# Supplementary material
Source: Springer Nature journal article supplement (https://www.springermedizin.de/resource/supplementary/12879_2011_2136_MOESM3_ESM.pdf/9443720)
Supplement: MOESM3 [file 9443720]

**Table 4: Distribution of PfCRT polymorphism according to the drug sensitivities**

| Drug | Profils                                      | n         | N° (%), of strains with polymorphism : ( <i>PfCRT</i> ) |                   |                 |             |
|------|----------------------------------------------|-----------|---------------------------------------------------------|-------------------|-----------------|-------------|
|      |                                              |           | HAPLOTYPE 72-76                                         |                   |                 | p           |
|      |                                              |           | CVIEK                                                   | CVIET             | MIX             |             |
| CQ   | Resistant (IC50 ≥ 100 nM)                    | 20        | 0 (0.0%)                                                | 20 (100.0%)       | 0 (0.0%)        | <b>0.56</b> |
|      | Sensitive (IC50 < 100 nM)                    | 26        | 1 (3.8%)                                                | 25 (96.2%)        | 0 (0.0%)        |             |
| MDAQ | Resistant (IC50 ≥ 60 nM)                     | <b>24</b> | <b>1 (4.2%)</b>                                         | <b>23 (95.8%)</b> | <b>0 (0.0%)</b> | <b>0.29</b> |
|      | Sensitive (IC50 < 60 nM)                     | <b>22</b> | <b>0 (0.0%)</b>                                         | <b>22 (100%)</b>  | <b>0 (0.0%)</b> |             |
| MF   | Resistant (IC50 ≥ 20 nM)                     | 11        | 0 (0.0%)                                                | 11 (100.0%)       | 0 (0.0%)        | <b>0.58</b> |
|      | Sensitive (IC50 < 20 nM)                     | 35        | 1 (2.9%)                                                | 34 (97.1%)        | 0 (0.0%)        |             |
| DHA  | <b>Reduced</b> susceptibility (IC50 ≥ 10 nM) | 11        | 1 (9.1%)                                                | 10 (90.9%)        | 0 (0.0%)        | <b>0.23</b> |
|      | Sensitive (IC50 < 10 nM)                     | 35        | 0 (0.0%)                                                | 35 (100.0%)       | 0 (0.0%)        |             |
